# Supplementary material
Source: PubMed Central journal article supplement (PMC2796890)
Supplement: ddp484_1.pdf [file ddp484_1.pdf]

## SUPPLEMENTARY MATERIAL

**Supplementary Figure 1.** DotPlot analysis of the 5' upstream region of Nucleoredoxin-like 1 genes. The DotPlot compares two sequences according to their homologies on this representation. Each point shows a sequence homology at the corresponding coordinates. (A) Human and mouse DotPlot. (B) Human and rat DotPlot. (C) Mouse and rat DotPlot. The aligned regions correspond to the intergenic sequences between the ATG of *Nxn11* gene and *SLC27A1*, a gene located in the 5' direction of *Nxn11* in each species. The analysis was done with the Software \*dotpath\* (EMBOSS, parameter: word size = 4)

**Supplementary Figure 2.** Localization of Neuropilin 2 by binding of its ligand the semaphoring III/F. (A) Western Blot determining the production the recombinants proteins Alkaline Phosphatase (AP-Tag) and Semaphorin III/F fused with the alkaline Phosphatase (AP-SemaIII/F), in Cos-1 Cells. The human *SemaIII/F* has been cloned in the APtag1, vector previously descript (68). (B) Binding Assay. The recombinants proteins were applied on C57BL6@N mouse retinal sections at PN35 using the AP-TAG<sup>TM</sup> Kit B (GenHunter Corp.). Only the ganglion cells were marked with AP-*SemaIII/F* protein, localizing its cell surface receptor the Neuropilin 2. ONL, Outer Nuclear Layer; INL, Inner Nuclear Layer; GCL, Ganglion cells Layer. Bar scale 50  $\mu$ m.

**Supplementary Table 1.** The 133 transcription factors predicted to bind an element within the 4.2 kb 5' upstream region of the *Nxn11* gene.

# Supplementary Figure 1

## A

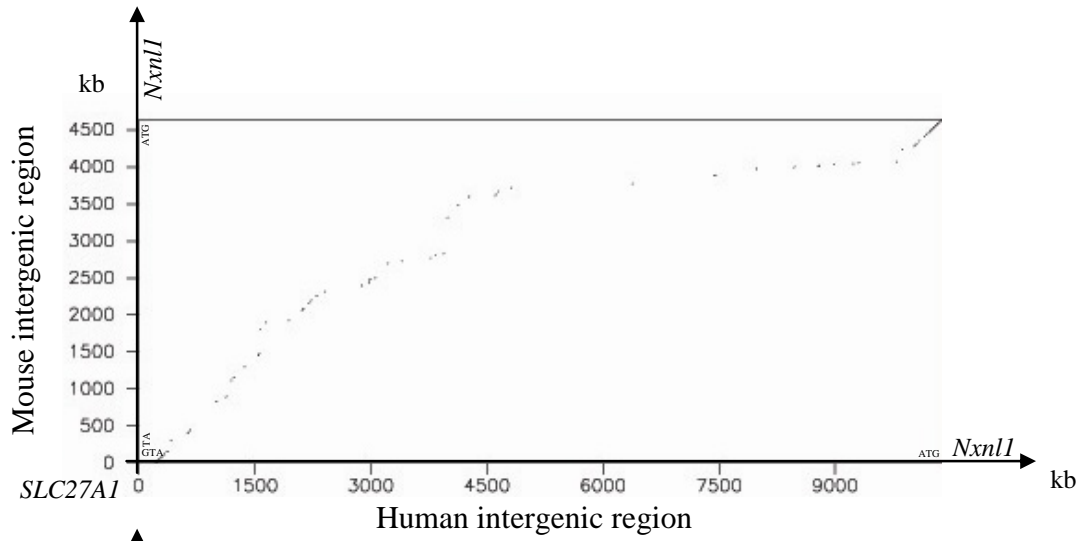

## B

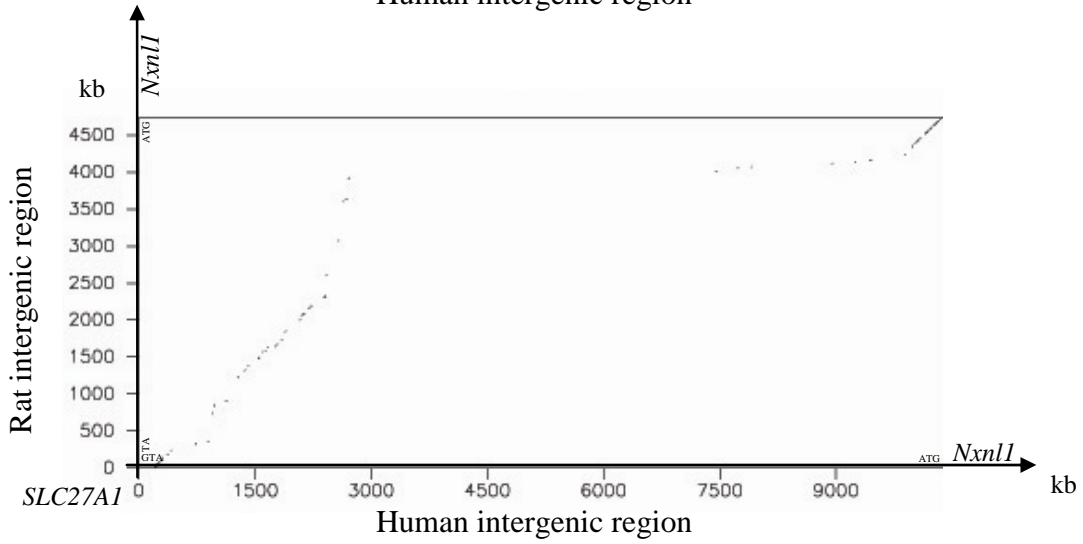

## C

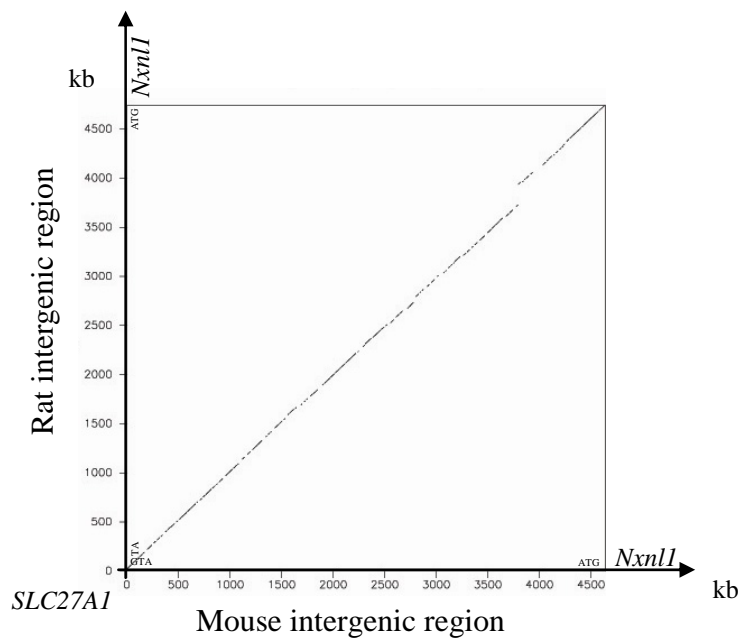

Supplementary Figure 2

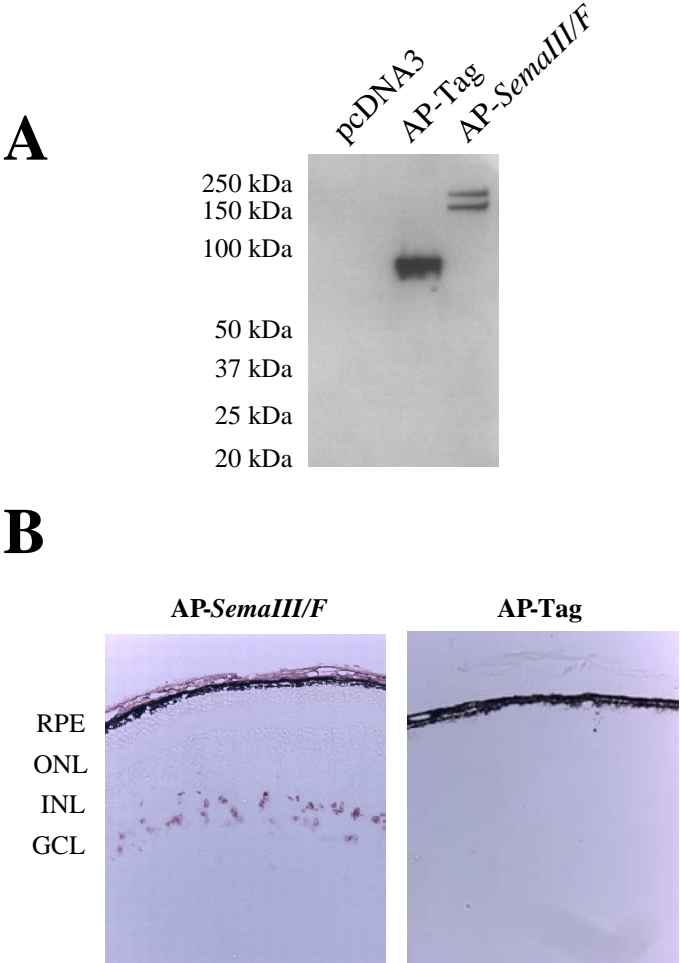

**Supplementary Table 1.**

| Gene ID NCBI | Gene Name                                                                             | Gene Symbol        |
|--------------|---------------------------------------------------------------------------------------|--------------------|
| 11622        | aryl-hydrocarbon receptor                                                             | Ahr                |
| 11634        | autoimmune regulator (autoimmune polyendocrinopathy candidiasis ectodermal dystrophy) | Aire               |
| 23983        | poly(rC) binding protein 1                                                            | alpha-Cp1 / Pcbp1  |
| 11695        | aristaless-like homeobox 4                                                            | Alx-4              |
| 4205         | myocyte enhancer factor 2A                                                            | Mef2a              |
| 21418        | transcription factor AP-2, alpha                                                      | Ap2 / Tcfap2a      |
| 16597        | Kruppel-like factor 12                                                                | Ap2rep / Klf12     |
| 11774        | adaptor-related protein complex 3, beta 1 subunit                                     | Ap3b1 / Ap3        |
| 83383        | transcription factor AP4                                                              | Tcfap4 / Ap4       |
| 11835        | androgen receptor                                                                     | Ar                 |
| 11819        | nuclear receptor subfamily 2, group F, member 2                                       | Arp1 / Nr2f2       |
| 11911        | activating transcription factor 4                                                     | Atf4               |
| 12014        | BTB and CNC homology 2                                                                | Bach2              |
| 20997        | brachyury                                                                             | Brachyury / T      |
| 12611        | CCAAT/enhancer binding protein (C/EBP), gamma                                         | C/Ebpgamma / Cebpg |
| 13052        | coxsackie virus and adenovirus receptor                                               | Cxadr / Car        |
| 12358        | cartilage homeo protein 1                                                             | Cart1              |
| 71702        | cell division cycle 5-like (S. pombe)                                                 | Cdc5               |
| 13047        | cut-like homeobox 1                                                                   | Cux1 / Cutl1 / Cdp |
| 12590        | caudal type homeo box 1                                                               | Cdx1               |
| 211151       | churchill domain containing 1                                                         | Churchill / Churc1 |
| 12677        | visual system homeobox 2                                                              | Chx10 / Vsx2       |
| 252877       | nuclear matrix protein 4                                                              | Ciz / Nmp4         |
| 17863        | myeloblastosis oncogene                                                               | c-Myb / Myb        |
| 17187        | Max protein                                                                           | c-Myc:Max / Max    |
| 21422        | transcription factor CP2                                                              | Tcfcp2 / Cp2       |
| 12951        | cone-rod homeobox containing gene                                                     | Crx                |
| 54006        | deformed epidermal autoregulatory factor 1 (Drosophila)                               | Deaf1              |
| 21417        | zinc finger E-box binding homeobox 1                                                  | Zeb1 / deltaEf1    |
| 1403641      | regulatory protein E2                                                                 | E2                 |
| 13555        | E2F transcription factor 1                                                            | E2f1               |
| 13560        | E4F transcription factor 1                                                            | E4f1               |
| 13653        | early growth response 1                                                               | Egr1 / Krox        |
| 13712        | ELK1, member of ETS oncogene family                                                   | Elk1               |
| 13798        | engrailed 1                                                                           | En1                |
| 104035       | repeated epilation                                                                    | Er                 |
| 21677        | TEA domain family member 2                                                            | Tead2 / Etf        |

|        |                                                                     |                 |
|--------|---------------------------------------------------------------------|-----------------|
| 14013  | ecotropic viral integration site 1                                  | Evi1            |
| 2186   | bromodomain PHD finger transcription factor                         | Fac1 / Bptf     |
| 20371  | forkhead box P3                                                     | Foxp3           |
| 14463  | GATA binding protein 4                                              | Gata4           |
| 14531  | glial cells missing homolog 1                                       | Gcm             |
| 14536  | nuclear receptor subfamily 6, group A, member 1                     | Gcnf / Nr6a1    |
| 209334 | Gen homolog 1, endonuclease (Drosophila)                            | Gen             |
| 14581  | growth factor independent 1                                         | Gfi1            |
| 14781  | grizzled                                                            | Gr              |
| 15110  | heart and neural crest derivatives expressed transcript 1           | Hand1           |
| 18071  | nescient helix loop helix 1                                         | Nhlh1 / Hen1    |
| 217082 | hepatic leukemia factor                                             | Hlf             |
| 15361  | high mobility group AT-hook 1                                       | Hmga1 / Hmg ly  |
| 21405  | HNF1 homeobox A                                                     | Hnf1a / Hnf1    |
| 2305   | forkhead box M1                                                     | Hnf-3 / Foxm1   |
| 171302 | forkhead box E3                                                     | Hnf-3 / Foxe3   |
| 15378  | hepatic nuclear factor 4, alpha                                     | Hnf4a           |
| 15379  | one cut domain, family member 1                                     | Hnf-6 / Onecut1 |
| 12419  | chromobox homolog 5 (Drosophila HP1a)                               | Cbx5 / Hp1      |
| 15499  | heat shock factor 1                                                 | Hsf / Hsf1      |
| 18609  | pancreatic and duodenal homeobox 1                                  | Pdx1 / Ipf1     |
| 54123  | interferon regulatory factor 7                                      | Irf7            |
| 16476  | Jun oncogene                                                        | Jun / Ap1       |
| 16842  | lymphoid enhancer binding factor 1                                  | Lef1            |
| 85437  | ZCRB1 zinc finger CCHC-type and RNA binding motif 1                 | Lf-a1 / Zcrb1   |
| 16871  | LIM homeobox protein 3                                              | Lhx3            |
| 14238  | forkhead box F2                                                     | Foxf2 / Lun1    |
| 22260  | nuclear receptor subfamily 1, group H, member 2                     | Lxr / Nr1h2     |
| 22778  | IKAROS family zinc finger 1                                         | Lyf1            |
| 17132  | avian musculoaponeurotic fibrosarcoma (v-maf) AS42 oncogene homolog | Maf             |
| 56218  | POZ (BTB) and AT hook containing zinc finger 1                      | Mazr            |
| 17260  | myocyte enhancer factor 2C                                          | Mef2c / Mef2    |
| 15405  | homeo box A9                                                        | Hoxa9           |
| 17268  | Meis homeobox 1                                                     | Meis1a          |
| 237412 | predicted gene, EG237412                                            | Mif1            |
| 71371  | AT rich interactive domain 5B (MRF1-like)                           | Arid5b / Mrf2   |
| 17764  | metal response element binding transcription factor 1               | Mtf1            |
| 17928  | Myogenin                                                            | Myog            |
| 18015  | neurofibromatosis 1                                                 | Nf1             |
| 21909  | T-cell leukemia, homeobox 2                                         | Ncx / Tlx2      |
| 307820 | nuclear factor of activated T-cells 5                               | Nfat5 / Nf-at   |

|        |                                                                             |                         |
|--------|-----------------------------------------------------------------------------|-------------------------|
| 18030  | nuclear factor, interleukin 3, regulated                                    | Nfil3 / E4bp4           |
| 18033  | nuclear factor of kappa light polypeptide gene enhancer in B-cells 1, p105  | NF-kappaB / Nfkb1       |
| 13591  | early B-cell factor 1                                                       | Ebf1 / Olf1             |
| 18519  | K(lysine) acetyltransferase 2B                                              | p300 / Pcaf / Kat2b     |
| 22059  | transformation related protein 53                                           | p53 / Trp53             |
| 18506  | paired box gene 4                                                           | Pax4                    |
| 5037   | phosphatidylethanolamine binding protein 1                                  | Pebp                    |
| 18736  | POU domain, class 1, transcription factor 1 (Pit1, growth hormone factor 1) | Pit1                    |
| 18771  | Pbx/knotted 1 homeobox                                                      | Pknox1 / Pbx            |
| 18986  | POU domain, class 2, transcription factor 1                                 | Pou2f1 / Oct1           |
| 19013  | peroxisome proliferator activated receptor alpha                            | Ppar                    |
| 18667  | progesterone receptor                                                       | Pr                      |
| 18171  | nuclear receptor subfamily 1, group I, member 2                             | Pxr                     |
| 217371 | Rab40b, member RAS oncogene family                                          | Rar                     |
| 19724  | regulatory factor X, 1                                                      | Rfx1                    |
| 104336 | zinc finger protein 104                                                     | Roaz                    |
| 19401  | retinoic acid receptor, alpha                                               | Rara / Roralpha1 / Rora |
| 30928  | zinc finger protein 238                                                     | Zfp238 / Rp58           |
| 68750  | ras responsive element binding protein 1                                    | Rreb1 / Rreb1           |
| 20181  | retinoid X receptor alpha                                                   | Rxra                    |
| 20186  | nuclear receptor subfamily 1, group H, member 4                             | Fxr / Nr1h4             |
| 20204  | paired related homeobox 2                                                   | Prrx2 / S8              |
| 26423  | nuclear receptor subfamily 5, group A, member 1                             | Sf1                     |
| 17128  | MAD homolog 4                                                               | Smad4                   |
| 20682  | SRY-box containing gene 9                                                   | Sox9                    |
| 20683  | trans-acting transcription factor 1                                         | Sp1                     |
| 20687  | trans-acting transcription factor 3                                         | Sp3                     |
| 79401  | spermatogenic leucine zipper 1                                              | Spz1                    |
| 20787  | sterol regulatory element binding transcription factor 1                    | Srebp1 / Sreb1          |
| 20807  | serum response factor                                                       | Srf                     |
| 21674  | sex determining region of Chr Y                                             | Sry                     |
| 20841  | zinc finger protein 143                                                     | Staf / Zfp143           |
| 20850  | signal transducer and activator of transcription 5A                         | Stat5a                  |
| 20892  | stimulated by retinoic acid 13                                              | Stra13                  |
| 21423  | transcription factor E2a                                                    | Tcfe2a / E47            |
| 21406  | transcription factor 12                                                     | Tcf12 / Heb             |
| 21685  | thyrotroph embryonic factor                                                 | Tef                     |
| 21676  | TEA domain family member 1                                                  | Tead1 / Tef1            |
| 83602  | general transcription factor II A, 1                                        | Gtf2a / Tfla            |
| 14886  | general transcription factor II I                                           | Gtf2i / TflI-I          |

|         |                                                                                       |               |
|---------|---------------------------------------------------------------------------------------|---------------|
| 21815   | TGFB-induced factor homeobox 1                                                        | Tgif          |
| 499766  | transcription termination factor, RNA polymerase I                                    | Ttf1          |
| 22278   | upstream transcription factor 1                                                       | Usf1          |
| 22282   | upstream transcription factor 2                                                       | Usf2          |
| 22337   | vitamin D receptor                                                                    | Vdr           |
| 217166  | nuclear receptor subfamily 1, group D, member 1                                       | Nr1d1 / vErbA |
| 15218   | forkhead box N1                                                                       | Foxn1 / Whn   |
| 50505   | excision repair cross-complementing rodent repair deficiency, complementation group 4 | Ercc4 / Xpf1  |
| 394455  | VENT homeobox 1, gene 2                                                               | Xvent1        |
| 22632   | YY1 transcription factor                                                              | Yy1           |
| 21417   | zinc finger E-box binding homeobox 1                                                  | Zeb1 / Areb6  |
| 22666   | zinc finger protein 161                                                               | Zfp161 / Zf5  |
| 22772   | zinc finger protein of the cerebellum 2                                               | Zic2          |
| 241322  | zinc finger and BTB domain containing 6                                               | Zbtb6 / Zid   |
| 3783744 | bZIP transcription factor                                                             | Zta / Bzlf1   |

---
